# Supplementary material
Source: Springer Nature journal article supplement (https://www.springermedizin.de/resource/supplementary/12943_2011_933_MOESM4_ESM.pdf/9551706)

**A.**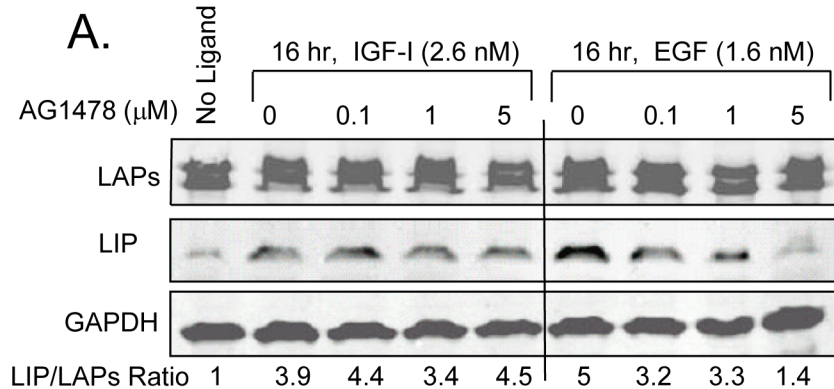

|                    |   |   |   |   |
|--------------------|---|---|---|---|
| IGF (2.6 nM)       | + | + | - | - |
| EGF (1.6 nM)       | - | - | + | + |
| AG1478 (5 $\mu$ M) | - | + | - | + |

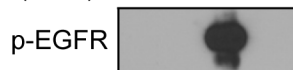**B.**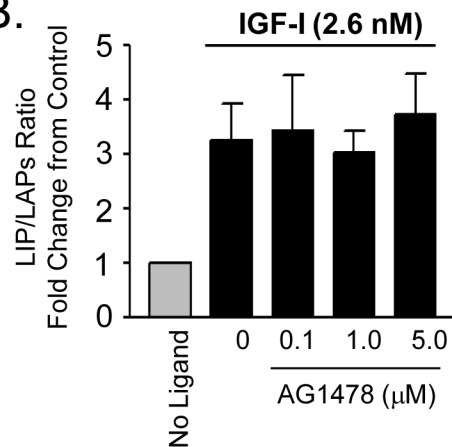**C.**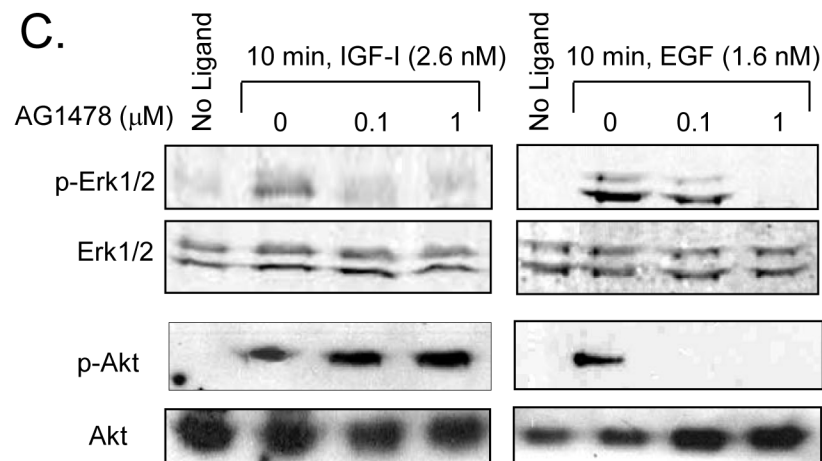**D.**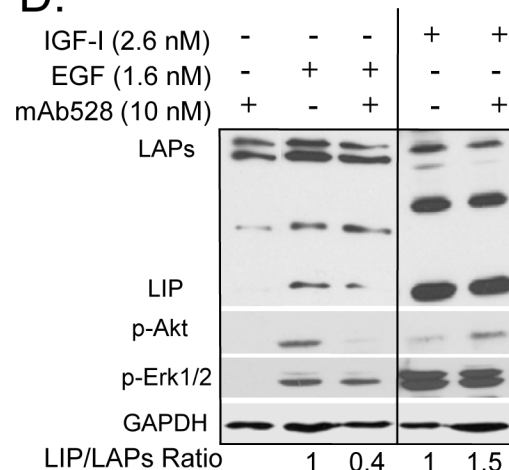

Supplement: MOESM4 [file 9551706]
